# Supplementary material
Source: PubMed Central journal article supplement (PMC30166)
Supplement: pnas_051611498_1.pdf [file pnas_051611498_1.pdf]

**Table 3.** 104 protein sequence data from five vertebrate species (data from Hovergen)

|    | Protein                                                     | Estimate ( <i>a</i> ) of gamma parameter | Number of amino acids used | Accession number* |
|----|-------------------------------------------------------------|------------------------------------------|----------------------------|-------------------|
| 1  | Insulin-like growth factor I                                | 0.588                                    | 112                        | FAM00007          |
| 2  | Prepro-insulin                                              | 0.811                                    | 106                        | FAM00008          |
| 3  | Heparin cofactor II                                         | 1.139                                    | 453                        | FAM000037         |
| 4  | Muscarinic acetylcholine receptor M1                        | 0.454                                    | 459                        | FAM000059d        |
| 5  | Angiotensin II receptor type I                              | 0.994                                    | 354                        | FAM000084         |
| 6  | Alcohol dehydrogenase-1 (Adh-1)                             | 0.938                                    | 228                        | FAM000111         |
| 7  | Gastric H <sup>+</sup> , K <sup>+</sup> ATPase beta-subunit | 1.144                                    | 281                        | FAM000133         |
| 8  | Na <sup>+</sup> , K <sup>+</sup> ATPase beta-subunit        | 0.718                                    | 301                        | FAM000135         |
| 9  | Acetylcholine receptor delta-subunit                        | 0.886                                    | 508                        | FAM000152a        |
| 10 | Acetylcholine gamma-subunit                                 | 1.307                                    | 500                        | FAM000152b        |
| 11 | Acetylcholine receptor alpha-subunit                        | 0.409                                    | 456                        | FAM000152e        |
| 12 | Serum albumin                                               | 4.916                                    | 596                        | FAM000192         |
| 13 | Gap junction protein connexin-4                             | 0.23                                     | 377                        | FAM000242         |
| 14 | Alpha-A-crystallin                                          | 0.887                                    | 163                        | FAM000248a        |
| 15 | Cu-Zn superoxide dismutase (SOD1)                           | 0.853                                    | 150                        | FAM000256         |
| 16 | Neural cadherin (N-cadherin)                                | 0.355                                    | 900                        | FAM000258         |
| 17 | Basic fibroblast growth factor (bFGF)                       | 0.369                                    | 152                        | FAM000274         |
| 18 | Preproglucagon                                              | 1.358                                    | 131                        | FAM000286         |
| 19 | Bone morphogenetic protein-4 (BMP-4)                        | 0.392                                    | 394                        | FAM000306a        |
| 20 | Bone morphogenetic protein-2 (BMP-2)                        | 0.581                                    | 351                        | FAM000306b        |
| 21 | Tissue inhibitor of metalloproteinase-3 (TIMP-3)            | 0.512                                    | 209                        | FAM000330b        |
| 22 | Aldehyde dehydrogenase I (ALDH-1)                           | 0.595                                    | 499                        | FAM000337         |
| 23 | Ornithine decarboxylase (ODC)                               | 0.489                                    | 448                        | FAM000348         |
| 24 | Osteonectin (Sparc)                                         | 0.367                                    | 292                        | FAM000350         |
| 25 | Poly (ADP-ribose) synthetase                                | 0.634                                    | 990                        | FAM000356         |
| 26 | Phosphatase 2A-beta (PP2A-beta)                             | 0.039                                    | 309                        | FAM000362         |
| 27 | Preprosomatostatin                                          | 0.398                                    | 115                        | FAM000371         |
| 28 | ABC transporter (TAP2)                                      | 2.661                                    | 656                        | FAM000385         |
| 29 | Tryptophan hydroxylase (Tph)                                | 0.668                                    | 437                        | FAM000388b        |
| 30 | Iron binding protein (ferretin) heavy chain                 | 0.403                                    | 176                        | FAM000533         |
| 31 | Glutamine synthetase                                        | 0.46                                     | 368                        | FAM000534         |
| 32 | Retinol-binding protein (RBP)                               | 0.924                                    | 189                        | FAM000555         |
| 33 | Type IIA activin receptor                                   | 0.286                                    | 513                        | FAM000561a        |
| 34 | Alpha-enolase (2-phospho-D-glycerate hydrolase)             | 0.252                                    | 434                        | FAM000627         |
| 35 | Cyclin D1                                                   | 0.711                                    | 290                        | FAM000646a        |
| 36 | Complement component C                                      | 1.96                                     | 1556                       | FAM000664         |

|    |                                                  |       |      |            |
|----|--------------------------------------------------|-------|------|------------|
| 37 | Zona pellucida glycoprotein-3 (ZP3)              | 3.254 | 397  | FAM000667  |
| 38 | Helix-loop-helix protein (Id-2)                  | 0.243 | 133  | FAM000769  |
| 39 | Cardiac troponin                                 | 0.74  | 162  | FAM000868a |
| 40 | Hepatic nuclear factor 1-alpha unit              | 0.608 | 585  | FAM001004b |
| 41 | Retinal degeneration slow (RDS) protein          | 0.602 | 343  | FAM001091  |
| 42 | Hepatocyte growth factor (HGF)                   | 0.883 | 706  | FAM001247a |
| 43 | Hepatocyte growth factor-like protein            | 1.243 | 692  | FAM001247c |
| 44 | Vimentin (intermediate filament)                 | 0.365 | 455  | FAM001327a |
| 45 | Middle weight neurofilament (NF-M)               | 0.838 | 748  | FAM001328b |
| 46 | Cardiac calsequestrin                            | 1.301 | 380  | FAM001355  |
| 47 | Steroidogenic factor-1 SF-1                      | 0.505 | 451  | FAM001365a |
| 48 | Thyroid hormone receptor alpha (c-erbA)          | 0.288 | 408  | FAM001369a |
| 49 | Thyroid hormone receptor beta subunit            | 0.192 | 368  | FAM001369b |
| 50 | Very low density lipoprotein receptor (VLDLR)    | 0.398 | 830  | FAM001390b |
| 51 | Domain transcription factor LIM-1                | 0.187 | 401  | FAM001396  |
| 52 | Cyclin-dependent kinase (CDC2)                   | 0.422 | 296  | FAM001432b |
| 53 | Neural cell-adhesion molecule (N-CAM)            | 0.576 | 716  | FAM001444  |
| 54 | Neural cell surface protein F                    | 0.665 | 991  | FAM001446a |
| 55 | Focal adhesion kinase (FAK)                      | 0.182 | 1051 | FAM001463  |
| 56 | Protein-tyrosine (src) kinase (CSK)              | 0.224 | 450  | FAM001467  |
| 57 | Neural receptor protein-tyrosine kinase (trkB)   | 0.508 | 797  | FAM001471b |
| 58 | Insulin-like growth factor I receptor            | 0.434 | 1301 | FAM001471e |
| 59 | c-met oncogene                                   | 0.881 | 1366 | FAM001472  |
| 60 | c-kit receptor tyrosine kinase                   | 0.957 | 924  | FAM001478b |
| 61 | Oocyte maturation factor Mos (c-mos)             | 1.456 | 324  | FAM001493  |
| 62 | Fibronectin (FN1)                                | 0.839 | 1069 | FAM001519  |
| 63 | Zinc finger protein slug (SLUG)                  | 0.665 | 148  | FAM001601  |
| 64 | Wilms tumor protein                              | 0.35  | 375  | FAM001607  |
| 65 | Integrin beta-1 subunit                          | 0.376 | 789  | FAM001621  |
| 66 | Muscle regulatory factor (MRF4)                  | 0.38  | 239  | FAM001622c |
| 67 | Achaete-scute homologue                          | 0.293 | 189  | FAM001624  |
| 68 | Collagenase-3 (matrix metalloproteinase-13)      | 1.02  | 378  | FAM001631c |
| 69 | Fos-related antigen-2 (fra-2)                    | 0.336 | 313  | FAM001679a |
| 70 | Follistatin (activin antagonist)                 | 0.354 | 315  | FAM001730  |
| 71 | Structure-specific recognition protein 1 (SSRP1) | 0.305 | 529  | FAM001987  |
| 72 | Gonadotrophin-releasing hormone (GnRH)           | 3.093 | 87   | FAM002205  |
| 73 | Alpha 2,8-sialyltransferase-1 (pst-1)            | 0.577 | 353  | FAM002490  |
| 74 | Syndecan-3 (Syn-3)                               | 2.598 | 317  | FAM002852  |
| 75 | Distal-less 3 (Dlx-5) homeobox                   | 0.331 | 278  | FAM002888a |
| 76 | Homeobox protein Nkx-2.5 subunit                 | 1.097 | 285  | FAM002890b |
| 77 | Corticotrophin-releasing factor type1 receptor   | 0.375 | 410  | FAM003058b |

|     |                                                |       |     |                         |
|-----|------------------------------------------------|-------|-----|-------------------------|
| 78  | T-cell leukemia (LERK-2)                       | 0.439 | 326 | FAM003670               |
| 79  | Delta-1 protein                                | 0.584 | 705 | FAM003932a              |
| 80  | Conductin/axin (AXIN)                          | 0.667 | 818 | FAM006148               |
| 81  | Transforming growth factor – beta3             | 0.653 | 389 | FAM000027 <sup>†</sup>  |
| 82  | Na, K-ATPase beta-2 subunit (ATP1B2)           | 1.61  | 271 | FAM000134 <sup>†</sup>  |
| 83  | Embryonic beta-type globin                     | 1.364 | 137 | FAM000214 <sup>†</sup>  |
| 84  | Alpha globin                                   | 1.277 | 142 | FAM000215 <sup>†</sup>  |
| 85  | Heat shock protein                             | 0.138 | 650 | FAM000300 <sup>†</sup>  |
| 86  | Lactate dehydrogenase-A                        | 0.616 | 330 | FAM000364a <sup>†</sup> |
| 87  | Histone H2A                                    | 0.149 | 129 | FAM000427 <sup>†</sup>  |
| 88  | bcl-x regulator of cell death                  | 0.764 | 200 | FAM000506 <sup>†</sup>  |
| 89  | c-ets-1 (p54) protein                          | 0.202 | 437 | FAM000514 <sup>†</sup>  |
| 90  | Glutamine synthetase                           | 0.471 | 368 | FAM000534a <sup>†</sup> |
| 91  | Bone morphogenetic receptor                    | 0.28  | 522 | FAM000306d <sup>†</sup> |
| 92  | Cyclin (D2, D3)                                | 0.291 | 288 | FAM000646 <sup>†</sup>  |
| 93  | Furin                                          | 0.522 | 768 | FAM000747 <sup>†</sup>  |
| 94  | Hepatocyte growth factor (HGF)                 | 1.261 | 686 | FAM001247 <sup>†</sup>  |
| 95  | Liver glyceraldehyde-3-phosphate dehydrogenase | 0.243 | 332 | FAM001297 <sup>†</sup>  |
| 96  | Nucleolin                                      | 1.793 | 605 | FAM001318 <sup>†</sup>  |
| 97  | Vimentin                                       | 0.361 | 454 | FAM001327 <sup>†</sup>  |
| 98  | Lamin B1                                       | 0.675 | 578 | FAM001331 <sup>†</sup>  |
| 99  | Nucleolar phosphoprotein B23 (NPM1)            | 1.022 | 285 | FAM001359 <sup>†</sup>  |
| 100 | N-myc protein                                  | 0.698 | 398 | FAM001383 <sup>†</sup>  |
| 101 | CDC2 involved in cell cycle control            | 0.332 | 296 | FAM001432 <sup>†</sup>  |
| 102 | Protein tyrosine phosphatase (PTPase-alpha)    | 0.280 | 778 | FAM001447 <sup>†</sup>  |
| 103 | Phosphotyrosil protein phosphatase             | 0.084 | 591 | FAM001456 <sup>†</sup>  |
| 104 | M-sam fibroblast growth factor                 | 0.314 | 807 | FAM001479 <sup>†</sup>  |

\*Gene family names from the Hovergen database ([pbil.univ-lyon1.fr/search/query.html](http://pbil.univ-lyon1.fr/search/query.html)).

<sup>†</sup>Entries 81--104 from Hovergen 1996 Release.
